# Supplementary material for: The effect of the NH2 substituent on NH3: hydrazine as an alternative for ammonia in hydrogen release in the presence of boranes and alanes
Source: Royal Society of Chemistry journal article supplement (doi:10.1039/b823358f), 2009-01-01

## **The Effect of the NH<sub>2</sub> Substituent on NH<sub>3</sub>: Hydrazine as an Alternative for Ammonia in Hydrogen Release in the Presence of Boranes and Alanes**

Nguyen Vinh-Son,<sup>b,c</sup> Saartje Swinnen,<sup>b</sup> Myrna H. Matus,<sup>a</sup> Minh Tho Nguyen<sup>\*,a,b</sup> and David A. Dixon<sup>\*,a,1</sup>

<sup>a</sup>*Department of Chemistry, The University of Alabama, Shelby Hall, Tuscaloosa, AL 35487-0336*

<sup>b</sup>*Department of Chemistry, University of Leuven, B-3001 Leuven, Belgium*

<sup>c</sup> *Department of Chemistry, Hanoi National University of Education, 136 XuanThuy Street, Hanoi, Vietnam*

**Supporting Information Available.** Optimized geometries (Cartesian coordinates and figures with selected parameters), CCSD(T) total energies, zero-point energies. Table S-1 lists the reaction Enthalpies and Free Energies. Table S-2 and S-3 show the Zero point energies (ZPE, kcal/mol) at MP2/aug-cc-pVDZ and CCSD(T) total energies (au) with the aVDZ, aVTZ basis sets for the points on the H<sub>2</sub>-release pathway from N<sub>2</sub>H<sub>4</sub> with a presence of borane, diborane, alane and dialane. Table S-4 lists the coordinates of all MP2/aVTZ optimized geometries. Figures S-1 and S-2 show the selected MP2/aug-cc-pVTZ geometry parameters for complex and product for H<sub>2</sub>-release from N<sub>2</sub>H<sub>4</sub> with a presence of borane, diborane, alane and dialane.

---

<sup>1</sup> Email: dadixon@as.ua.edu

**Table S-1:** Reaction Enthalpies and Free Energies (kcal/mol) for H<sub>2</sub> elimination Reactions at MP2/aVDZ level.

| <b>Reactions</b>                                                                                                                                                                                               | <b>ΔH</b>    | <b>ΔG</b>    |
|----------------------------------------------------------------------------------------------------------------------------------------------------------------------------------------------------------------|--------------|--------------|
| BH <sub>3</sub> + N <sub>2</sub> H <sub>4</sub> → BH <sub>2</sub> NHNH <sub>2</sub> + H <sub>2</sub><br>( <b>b</b> + <b>hyz</b> → <b>bhyz-p</b> + H <sub>2</sub> )                                             | <b>-34.1</b> | <b>-32.7</b> |
| B <sub>2</sub> H <sub>6</sub> + N <sub>2</sub> H <sub>4</sub> → BH <sub>2</sub> NHNH <sub>2</sub> + BH <sub>3</sub> + H <sub>2</sub><br>( <b>db</b> + <b>hyz</b> → <b>bhyz-p</b> + <b>b</b> + H <sub>2</sub> ) | <b>4.4</b>   | <b>7.8</b>   |
| AlH <sub>3</sub> + N <sub>2</sub> H <sub>4</sub> → AlH <sub>2</sub> NHNH <sub>2</sub> + H <sub>2</sub><br>( <b>al</b> + <b>hyz</b> → <b>alhyz-p</b> + H <sub>2</sub> )                                         | <b>-16.8</b> | <b>-14.3</b> |
| Al <sub>2</sub> H <sub>6</sub> + N <sub>2</sub> H <sub>4</sub> → Al <sub>2</sub> H <sub>5</sub> NHNH <sub>2</sub> + H <sub>2</sub><br>( <b>dal</b> + <b>hyz</b> → <b>dalhyz-p</b> + H <sub>2</sub> )           | <b>-20.4</b> | <b>-17.6</b> |
| BH <sub>3</sub> AlH <sub>3</sub> + N <sub>2</sub> H <sub>4</sub> → AlBH <sub>5</sub> NHNH <sub>2</sub> + H <sub>2</sub><br>( <b>bal</b> + <b>hyz</b> → <b>balhyz-p</b> + H <sub>2</sub> )                      | <b>-3.8</b>  | <b>-0.9</b>  |

**Table S-2:** Zero point energies (ZPE, kcal/mol) at MP2/aug-cc-pVDZ and MP2/aug-cc-pVTZ, and CCSD(T) total energies (au) with the aVDZ, aVTZ basis sets for the points on the H<sub>2</sub>-release pathway from hydrazine with a presence of borane and diborane.

| <b>Molecule</b>                              | <b>ZPE</b> | <b>E(MP2/aVTZ)<sup>a</sup></b> | <b>E(CCSD(T)/aVDZ)<sup>a</sup></b> | <b>E(CCSD(T)/aVTZ)<sup>a</sup></b> |
|----------------------------------------------|------------|--------------------------------|------------------------------------|------------------------------------|
| BH <sub>3</sub> ( <b>b</b> )                 | 16.67      | -26.5150147                    | -26.5122640                        | -26.5390576                        |
| N <sub>2</sub> H <sub>4</sub> ( <b>hyz</b> ) | 33.62      | -111.6767950                   | -111.6081220                       | -111.7112807                       |
| <b>b + hyz</b>                               | 50.28      | -138.1918097                   | -138.1203860                       | -138.2503383                       |
| B <sub>2</sub> H <sub>6</sub> ( <b>db</b> )  | 39.87      | -53.1006631                    | -53.0885066                        | -53.1464202                        |
| <b>db + hyz</b>                              | 73.49      | -164.7774581                   | -164.6966286                       | -164.8577009                       |
| <b>bhyz</b>                                  | 55.21      | -138.2499776                   | -138.1748963                       | -138.3070724                       |
| <b>b + bhyz</b>                              | 71.87      | -164.7649923                   | -164.6871603                       | -164.8461300                       |
| <b>dbhyz-com</b>                             | 74.37      | -164.783066                    | -164.7030571                       | -164.8632920                       |
| <b>dbhyz</b>                                 | 75.82      | -164.800436                    | -164.7204889                       | -164.8808392                       |
| <b>bhyz-ts</b>                               | 51.16      | -138.1851446                   | -138.1065475                       | -138.2398672                       |
| <b>dbhyz-com-ts</b>                          | 74.66      | -164.775863                    | -164.6954213                       | -164.8552817                       |
| <b>dbhyz-ts</b>                              | 71.29      | -164.754466                    | -164.6730815                       | -164.8333949                       |
| <b>bhyz-p + H<sub>2</sub></b>                | 47.29      | -138.2455716                   | -138.1686549                       | -138.3022674                       |
| <b>bhyz-p + b + H<sub>2</sub></b>            | 63.96      | -164.7605863                   | -164.6809189                       | -164.8413250                       |

<sup>a</sup> Based on MP2/aug-cc-pVTZ optimized geometries.

**Table S-3:** Zero point energies (ZPE, kcal/mol) at MP2/aug-cc-pVDZ and MP2/aug-cc-pVTZ, and CCSD(T) total energies (au) with the aVDZ, aVTZ basis sets for the points on the H<sub>2</sub>-release pathway from hydrazine with a presence of alane and dialane.

| <b>Molecule</b>                               | <b>ZPE</b> | <b>E(MP2/aVTZ)<sup>a</sup></b> | <b>E(CCSD(T)/aVDZ)<sup>a</sup></b> | <b>E(CCSD(T)/aVTZ)<sup>a</sup></b> |
|-----------------------------------------------|------------|--------------------------------|------------------------------------|------------------------------------|
| AlH <sub>3</sub> ( <b>al</b> )                | 11.73      | -243.7403261                   | -243.7397977                       | -243.7651104                       |
| N <sub>2</sub> H <sub>4</sub> ( <b>hyz</b> )  | 33.62      | -111.6767950                   | -111.6081220                       | -111.7112807                       |
| <b>al + hyz</b>                               | 45.35      | -355.4171211                   | -355.3479197                       | -355.4763911                       |
| Al <sub>2</sub> H <sub>6</sub> ( <b>dal</b> ) | 27.76      | -487.5396665                   | -487.5335392                       | -487.5895777                       |
| <b>dal + hyz</b>                              | 61.39      | -599.2164615                   | -599.1416612                       | -599.3008584                       |
| <b>alhyz</b>                                  | 48.40      | -355.4662924                   | -355.3939515                       | -355.5254396                       |
| <b>al + alhyz</b>                             | 60.14      | -599.2066185                   | -599.1337492                       | -599.2905500                       |
| <b>dalhyz</b>                                 | 62.89      | -599.247865                    | -599.1727911                       | -599.3321928                       |
| <b>alhyz-ts</b>                               | 44.86      | -355.4152408                   | -355.3376658                       | -355.4714282                       |
| <b>dalhyz-ts</b>                              | 59.90      | -599.212405                    | -599.1317249                       | -599.2937693                       |
| <b>alhyz-p + H<sub>2</sub></b>                | 41.81      | -355.4469480                   | -355.3672124                       | -355.5033978                       |
| <b>dalhyz-p + H<sub>2</sub></b>               | 57.38      | -599.2637824                   | -599.1814956                       | -599.3450937                       |

<sup>a</sup> Based on MP2/aug-cc-pVTZ optimized geometries.

**Table S-4:** Zero point energies (ZPE, kcal/mol) at MP2/aug-cc-pVDZ and MP2/aug-cc-pVTZ, and CCSD(T) total energies (au) with the aVDZ, aVTZ basis sets for the points on the H<sub>2</sub>-release pathway from hydrazine with a presence of borane-alane.

| <b>Molecule</b>                                               | <b>ZPE</b> | <b>E(MP2/aVTZ)<sup>a</sup></b> | <b>E(CCSD(T)/aVDZ)<sup>a</sup></b> | <b>E(CCSD(T)/aVTZ)<sup>a</sup></b> |
|---------------------------------------------------------------|------------|--------------------------------|------------------------------------|------------------------------------|
| AlH <sub>3</sub> ( <b>al</b> )                                | 11.73      | -243.7403261                   | -243.7397977                       | -243.7651104                       |
| BH <sub>3</sub> N <sub>2</sub> H <sub>4</sub> ( <b>bhyz</b> ) | 55.21      | -138.2499776                   | -138.1748963                       | -138.3070724                       |
| N <sub>2</sub> H <sub>4</sub> ( <b>hyz</b> )                  | 33.62      | -111.6767950                   | -111.6081220                       | -111.7112807                       |
| BH <sub>3</sub> AlH <sub>3</sub> ( <b>bal</b> )               | 33.40      | -270.325378                    | -270.3156691                       | -270.3727211                       |
| <b>bal + hyz</b>                                              | 67.62      | -382.0021725                   | -381.9237910                       | -382.0840017                       |
| <b>al + bhyz</b>                                              | 66.94      | -381.9903037                   | -381.9146940                       | -382.0721828                       |
| <b>balhyz</b>                                                 | 69.61      | -382.02083                     | -381.9436210                       | -382.1028113                       |
| <b>ts-balhyz</b>                                              | 67.92      | -381.9841234                   | -381.9083577                       | -382.0666163                       |
| <b>balhyz-ts</b>                                              | 66.80      | -381.991311                    | -381.9078866                       | -382.0700692                       |
| <b>balhyz-p + H<sub>2</sub></b>                               | 62.52      | -382.0038754                   | -381.9216375                       | -382.0840201                       |

**Table S-5:** Geometries of the Structures Considered Optimized at the MP2/aug-cc-pVTZ

Level of Theory, Given in Cartesian Coordinates (Å)

**1. bhyz**

|   |           |           |           |
|---|-----------|-----------|-----------|
| N | 0.042692  | 0.548716  | 0.002598  |
| H | 0.074294  | 1.098623  | 0.856840  |
| N | 1.191725  | -0.308406 | -0.125800 |
| H | 1.939858  | 0.046268  | 0.458858  |
| H | 0.054408  | 1.189569  | -0.784396 |
| H | 0.893111  | -1.202276 | 0.251724  |
| H | -2.216569 | 0.547128  | 0.099930  |
| B | -1.353843 | -0.292497 | 0.005938  |
| H | -1.254562 | -1.000060 | 0.984365  |
| H | -1.362250 | -0.898934 | -1.034599 |

**3. dbhyz**

|   |           |           |           |
|---|-----------|-----------|-----------|
| N | 0.678167  | 0.322231  | 0.495546  |
| B | -0.418008 | 1.076359  | -0.368546 |
| N | 1.485861  | -0.679014 | -0.179353 |
| B | -1.838397 | -0.634515 | 0.059993  |
| H | -0.885734 | 1.968957  | 0.269125  |
| H | -1.854995 | -0.217693 | 1.185534  |
| H | 0.100099  | 1.376532  | -1.412025 |
| H | -1.289042 | 0.250837  | -0.791917 |
| H | 0.221740  | -0.151555 | 1.276270  |
| H | 1.330512  | 0.989967  | 0.899960  |
| H | -1.132461 | -1.598276 | -0.120870 |
| H | -2.899024 | -0.675237 | -0.490189 |
| H | 1.726745  | -0.246772 | -1.068510 |
| H | 0.815990  | -1.408499 | -0.417959 |

**5. bhyz-p**

|   |           |           |           |
|---|-----------|-----------|-----------|
| N | -0.000000 | 0.454740  | 0.000000  |
| N | 1.141603  | -0.398969 | -0.000000 |
| B | -1.336462 | 0.070029  | 0.000000  |
| H | 1.080718  | -0.999430 | 0.813493  |
| H | 0.283484  | 1.420798  | 0.000000  |
| H | 1.080718  | -0.999430 | -0.813493 |
| H | -1.595496 | -1.093444 | -0.000000 |
| H | -2.158339 | 0.930962  | 0.000000  |

**7. dalhyz-p**

|    |           |           |           |
|----|-----------|-----------|-----------|
| N  | 0.000000  | 0.582749  | 0.574043  |
| N  | 0.000002  | 1.905575  | -0.044223 |
| Al | 1.350893  | -0.672358 | -0.103405 |
| Al | -1.350894 | -0.672356 | -0.103405 |
| H  | -1.962594 | -1.590373 | 1.024156  |
| H  | 2.136932  | 0.055539  | -1.267230 |
| H  | 0.000000  | 0.739858  | 1.574947  |

**2. alhyz**

|    |           |           |           |
|----|-----------|-----------|-----------|
| N  | -0.644727 | 0.625839  | -0.003654 |
| N  | -1.623058 | -0.420958 | 0.127506  |
| Al | 1.279920  | -0.136875 | -0.000837 |
| H  | -0.775919 | 1.262470  | 0.775894  |
| H  | -2.486080 | -0.143362 | -0.324885 |
| H  | 1.584552  | -0.325039 | 1.550944  |
| H  | -0.760297 | 1.161504  | -0.861002 |
| H  | 2.013369  | 1.056320  | -0.773654 |
| H  | 0.902967  | -1.445015 | -0.854989 |
| H  | -1.243049 | -1.221666 | -0.368390 |

**4. dalhyz**

|    |           |           |           |
|----|-----------|-----------|-----------|
| N  | -1.160431 | -0.417004 | 0.633650  |
| N  | -1.479652 | -1.477975 | -0.323334 |
| Al | -0.623541 | 1.348255  | -0.163945 |
| Al | 2.022725  | -0.276850 | -0.001324 |
| H  | -0.385946 | -0.757666 | 1.211426  |
| H  | 1.507651  | -0.339206 | 1.525850  |
| H  | -1.506729 | 1.376108  | -1.481149 |
| H  | -1.957611 | -0.357547 | 1.262822  |
| H  | -0.694670 | 2.417502  | 0.996289  |
| H  | 1.400880  | -1.497302 | -0.841439 |
| H  | 0.946800  | 0.999098  | -0.579183 |
| H  | 3.457612  | 0.290755  | -0.339136 |
| H  | -1.904435 | -0.999648 | -1.114865 |
| H  | -0.572365 | -1.795503 | -0.664324 |

**6. alhyz-p**

|    |           |           |           |
|----|-----------|-----------|-----------|
| Al | -1.201094 | 0.128109  | 0.000000  |
| N  | 0.460590  | -0.534549 | 0.000000  |
| N  | 1.709578  | 0.177629  | 0.000000  |
| H  | 1.745210  | 0.778909  | -0.813969 |
| H  | 0.663337  | -1.522690 | 0.000000  |
| H  | 1.745210  | 0.778907  | 0.813970  |
| H  | -1.336383 | 1.701253  | -0.000001 |
| H  | -2.394330 | -0.903363 | 0.000000  |

**8. bhyz-ts**

|   |           |           |           |
|---|-----------|-----------|-----------|
| N | -0.052753 | -0.535080 | 0.002795  |
| N | -1.287438 | 0.167077  | -0.063011 |
| B | 1.295843  | 0.276655  | -0.125121 |
| H | 0.806157  | -0.233968 | 1.044164  |
| H | -1.594052 | 0.385748  | 0.877427  |
| H | -0.103734 | -1.394593 | -0.518710 |
| H | -1.131625 | 1.049077  | -0.540763 |

|   |           |           |           |
|---|-----------|-----------|-----------|
| H | 1.962591  | -1.590376 | 1.024156  |
| H | -0.000001 | -1.534753 | -0.804723 |
| H | -2.136932 | 0.055541  | -1.267231 |
| H | 0.811195  | 1.963782  | -0.652152 |
| H | -0.811196 | 1.963787  | -0.652145 |

#### 9. alhyz-ts

|    |           |           |           |
|----|-----------|-----------|-----------|
| Al | 1.206749  | 0.155319  | -0.046762 |
| N  | -0.560332 | -0.590907 | -0.130500 |
| N  | -1.709173 | 0.272413  | -0.064753 |
| H  | 0.073819  | -0.593546 | 1.112415  |
| H  | -1.943187 | 0.433099  | 0.910358  |
| H  | -0.822232 | -1.452906 | -0.588540 |
| H  | -1.463402 | 1.174427  | -0.457761 |
| H  | 0.793921  | -0.227798 | 1.683009  |
| H  | 1.210719  | 1.726168  | -0.221913 |
| H  | 2.349162  | -0.849130 | -0.462894 |

#### 11. dalhyz-ts

|    |           |           |           |
|----|-----------|-----------|-----------|
| N  | 1.033889  | -0.399225 | 0.570235  |
| Al | 0.738600  | 1.309963  | -0.120347 |
| Al | -1.953342 | -0.182389 | -0.121124 |
| H  | -0.612205 | -0.758602 | 1.238149  |
| H  | -1.459261 | -1.269860 | -1.144742 |
| H  | 0.859387  | 2.467121  | 0.953883  |
| H  | 1.518923  | -0.479933 | 1.455899  |
| N  | 1.482281  | -1.510158 | -0.247194 |
| H  | 1.063994  | 1.437096  | -1.666004 |
| H  | -1.357359 | -0.854961 | 1.532788  |
| H  | -1.091900 | 1.209006  | -0.162538 |
| H  | -3.434949 | 0.035550  | 0.359621  |
| H  | 2.031229  | -1.147958 | -1.020716 |
| H  | 0.660602  | -1.930244 | -0.668501 |

#### 13. dbhyz-com

|   |           |           |           |
|---|-----------|-----------|-----------|
| N | -1.346757 | 0.758156  | 0.066974  |
| N | -2.044050 | -0.456222 | -0.246228 |
| B | 1.310994  | -0.740879 | 0.208880  |
| B | 2.580186  | 0.396781  | -0.159348 |
| H | 2.957337  | 0.499368  | -1.278856 |
| H | -1.425540 | 0.991266  | 1.051185  |
| H | 1.277545  | 0.518585  | -0.141739 |
| H | 3.040632  | 1.044683  | 0.721191  |
| H | 2.622297  | -0.864891 | 0.181742  |
| H | -1.790314 | 1.499105  | -0.459204 |

|   |          |           |           |
|---|----------|-----------|-----------|
| H | 1.586120 | 0.339917  | 1.195846  |
| H | 1.155464 | 1.422693  | -0.433455 |
| H | 2.183787 | -0.376133 | -0.577391 |

#### 10. dbhyz-ts

|   |           |           |           |
|---|-----------|-----------|-----------|
| N | 0.640643  | 0.255599  | 0.481151  |
| N | 1.501772  | -0.710687 | -0.137441 |
| B | -0.121788 | 1.241023  | -0.309086 |
| B | -1.907664 | -0.538654 | -0.104513 |
| H | -0.682069 | -0.440529 | 0.851353  |
| H | -1.327346 | -1.263147 | -0.855446 |
| H | -0.470069 | 2.215054  | 0.281402  |
| H | 1.067491  | 0.578969  | 1.337765  |
| H | 0.003850  | 1.226423  | -1.491933 |
| H | -1.471310 | -0.740609 | 1.135989  |
| H | -1.681059 | 0.663550  | -0.284365 |
| H | -3.061397 | -0.767103 | 0.103010  |
| H | 1.852769  | -0.304931 | -0.998975 |
| H | 0.919494  | -1.493902 | -0.416777 |

#### 12. dbhyz-com-ts

|   |           |           |           |
|---|-----------|-----------|-----------|
| N | 0.909384  | -0.619531 | -0.012216 |
| N | 2.002836  | 0.296934  | -0.100369 |
| B | -0.788659 | 0.560418  | -0.030221 |
| B | -2.477413 | -0.154054 | 0.026140  |
| H | -2.995336 | -0.497408 | -0.990110 |
| H | -2.913581 | -0.491255 | 1.082515  |
| H | -0.447831 | 1.040322  | 1.007570  |
| H | -1.302693 | -0.664471 | -0.026913 |
| H | -2.237549 | 1.058319  | 0.009605  |
| H | -0.489365 | 1.033470  | -1.078331 |
| H | 0.919121  | -1.157932 | 0.849099  |
| H | 0.971185  | -1.257482 | -0.797415 |
| H | 1.665430  | 1.177009  | 0.276268  |
| H | 2.775435  | -0.014214 | 0.476210  |

#### 14. ts-balhyz

|    |           |           |           |
|----|-----------|-----------|-----------|
| N  | 1.642578  | -0.639392 | -0.010783 |
| N  | 2.708516  | 0.309360  | -0.096321 |
| B  | -0.123687 | 0.502144  | -0.037801 |
| Al | -2.398406 | -0.043949 | 0.013386  |
| H  | -3.009426 | -0.538312 | -1.357196 |
| H  | -2.927829 | -0.532079 | 1.420739  |
| H  | 0.180838  | 0.969676  | 1.015489  |
| H  | -0.700388 | -0.611945 | -0.030587 |
| H  | -1.595644 | 1.368440  | -0.009382 |
| H  | 0.158009  | 0.968249  | -1.092992 |

|   |           |           |           |
|---|-----------|-----------|-----------|
| H | 0.946220  | -0.850970 | 1.332820  |
| H | 0.857302  | -1.401852 | -0.666029 |
| H | -2.818592 | -0.612778 | 0.388658  |
| H | -1.387141 | -1.215561 | -0.122647 |

**15. balhyz-ts**

|    |           |           |           |
|----|-----------|-----------|-----------|
| N  | 0.960374  | -0.124631 | 0.490219  |
| N  | 2.199190  | -0.341321 | -0.208138 |
| B  | 0.137514  | 1.068901  | -0.018754 |
| Al | -1.727739 | -0.168231 | -0.061040 |
| H  | 0.001589  | -1.179272 | -0.058337 |
| H  | -2.825634 | 0.118984  | -1.154138 |
| H  | -0.784774 | 1.281166  | 0.785421  |
| H  | 1.154936  | -0.146134 | 1.483017  |
| H  | 0.692783  | 2.099276  | -0.260466 |
| H  | -0.613946 | -1.561417 | -0.551429 |
| H  | -0.373189 | 0.676409  | -1.085897 |
| H  | -2.082772 | -0.746715 | 1.364058  |
| H  | 2.479716  | 0.539338  | -0.631777 |
| H  | 2.007383  | -0.977472 | -0.977733 |

**17. balhyz-p**

|    |           |           |           |
|----|-----------|-----------|-----------|
| N  | 1.222264  | -0.368348 | -0.365019 |
| N  | 2.451409  | -0.059195 | 0.293037  |
| B  | 0.090292  | 0.539645  | -0.251094 |
| Al | -2.004705 | -0.086453 | 0.110783  |
| H  | -3.073377 | 1.058361  | 0.023398  |
| H  | -0.601982 | 0.430020  | 0.922432  |
| H  | 1.083887  | -1.365819 | -0.351949 |
| H  | 0.295381  | 1.713756  | -0.315838 |
| H  | -0.797225 | 0.214812  | -1.126307 |
| H  | -2.223729 | -1.635336 | 0.258254  |
| H  | 2.267202  | 0.385173  | 1.186831  |
| H  | 2.943834  | 0.617508  | -0.277659 |

|   |          |           |           |
|---|----------|-----------|-----------|
| H | 1.663351 | -1.173111 | 0.852642  |
| H | 1.728928 | -1.278527 | -0.791851 |
| H | 2.348116 | 1.178285  | 0.283655  |
| H | 3.494094 | 0.020160  | 0.474201  |

**16. balhyz**

|    |           |           |           |
|----|-----------|-----------|-----------|
| N  | 1.135663  | -0.333640 | 0.290628  |
| N  | 2.407993  | -0.196296 | -0.362925 |
| B  | 0.255565  | 0.997113  | 0.126006  |
| Al | -2.086238 | -0.176448 | -0.086171 |
| H  | 0.841722  | 1.888558  | 0.677645  |
| H  | 0.613236  | -1.088545 | -0.163392 |
| H  | -0.759404 | 0.790634  | 0.803119  |
| H  | 0.051530  | 1.152942  | -1.041500 |
| H  | -2.800579 | -0.440393 | 1.311826  |
| H  | 1.232000  | -0.564474 | 1.278043  |
| H  | -2.767107 | 0.763960  | -1.158897 |
| H  | -1.161849 | -1.398311 | -0.594145 |
| H  | 2.719318  | 0.751365  | -0.177113 |
| H  | 3.068818  | -0.837922 | 0.060685  |



**Figure S-1.** Selected MP2/aVTZ geometry parameters of adducts, transition states and products related to the reaction  $\text{BH}_3 + \text{N}_2\text{H}_4$  (**b + hyz**) and  $\text{B}_2\text{H}_6 + \text{N}_2\text{H}_4$  (**db + hyz**). Bond distances in angstroms and bond angles in degrees.

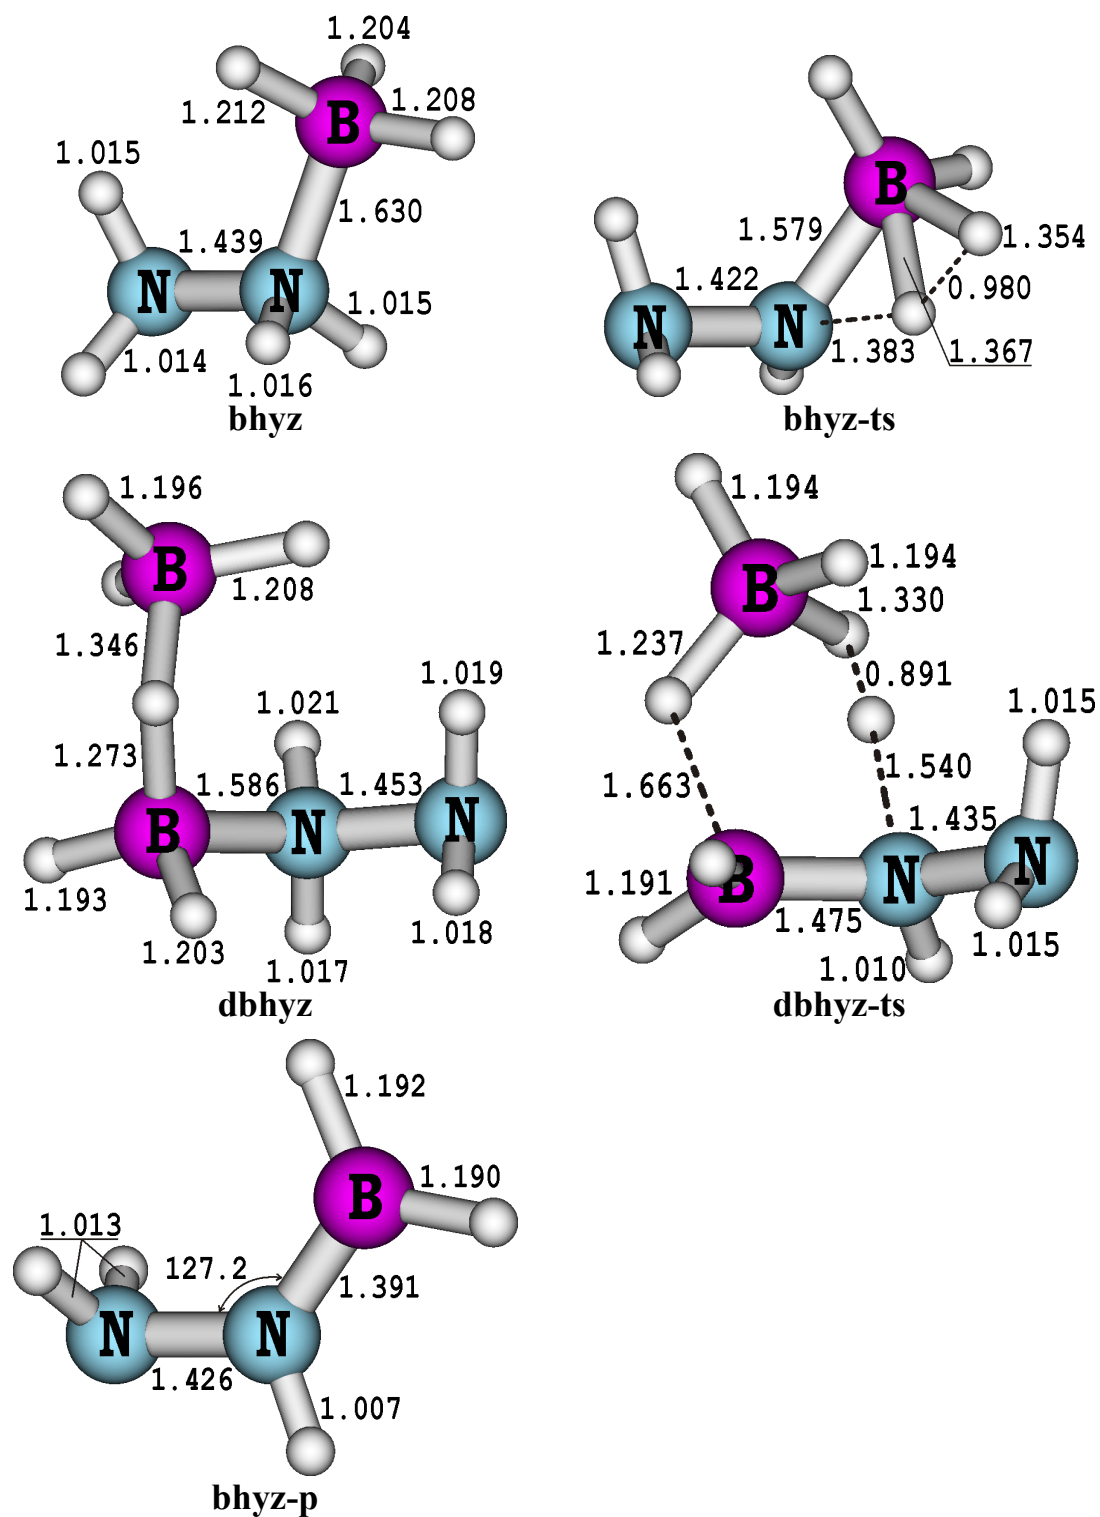

**Figure S-2.** Selected MP2/aVTZ geometry parameters of adducts, transition states and products related to the reaction  $\text{AlH}_3 + \text{N}_2\text{H}_4$  (**al** + **hyz**) and  $\text{Al}_2\text{H}_6 + \text{N}_2\text{H}_4$  (**dal** + **hyz**). Bond distances in angstroms and bond angles in degrees.

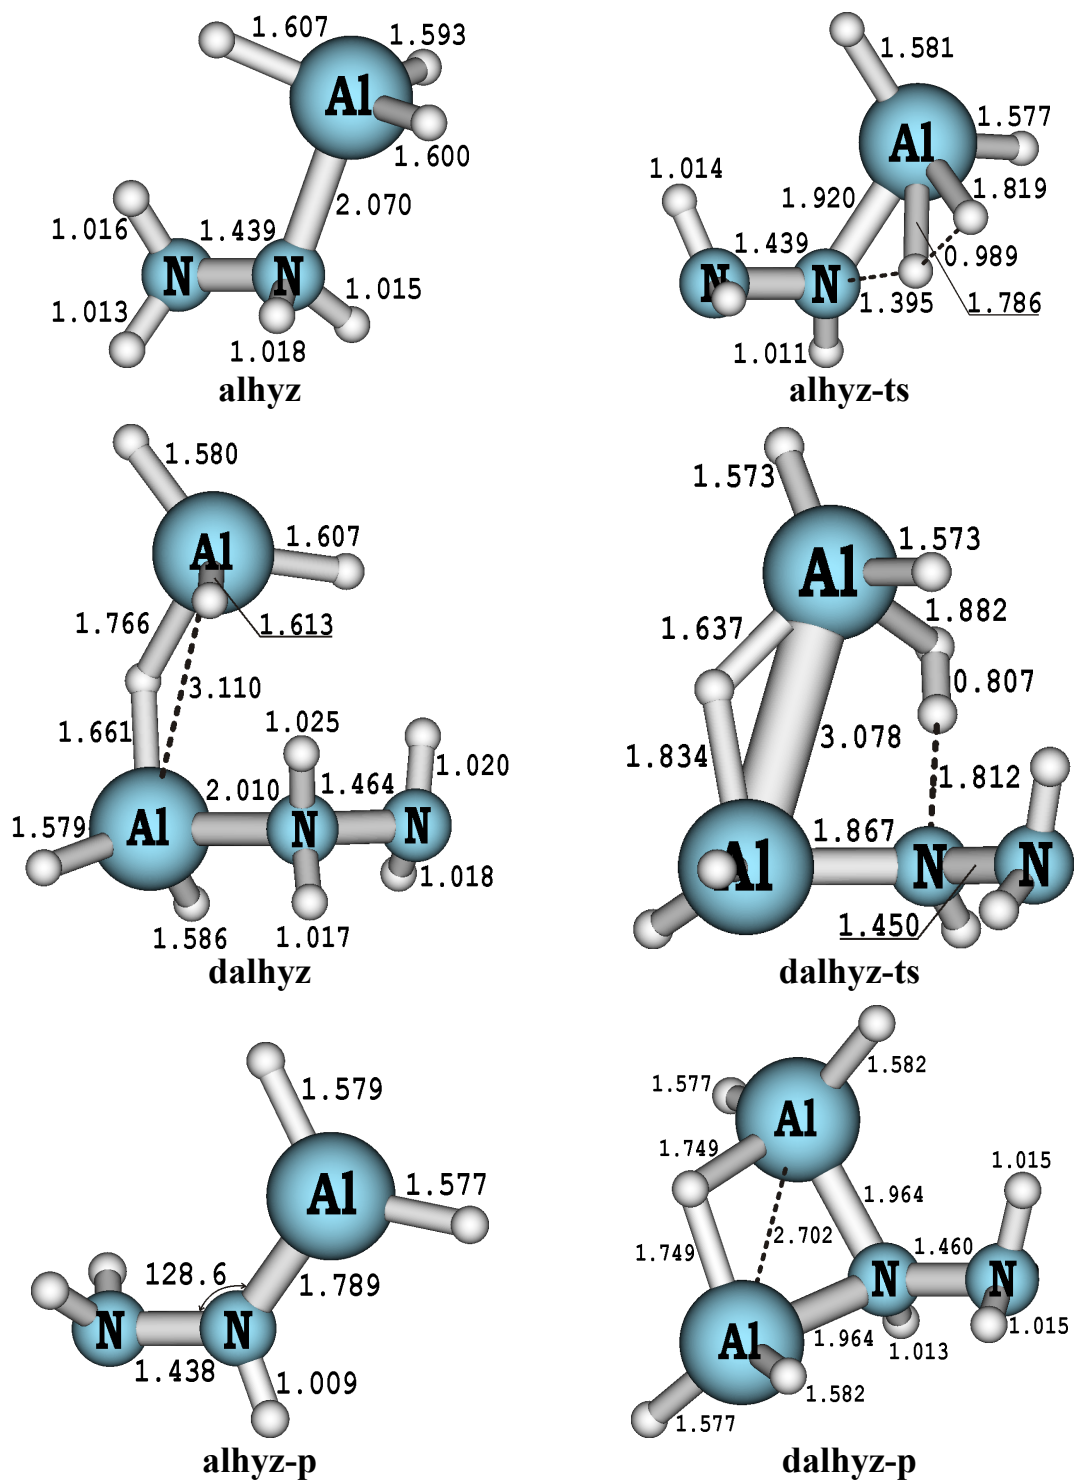

**Figure S-3.** Selected MP2/aVTZ geometry parameters of adducts, transition states and products related to the reaction  $\text{BH}_3\text{AlH}_3 + \text{N}_2\text{H}_4$  (**bal** + **hyz**). Bond distances in angstroms and bond angles in degrees.

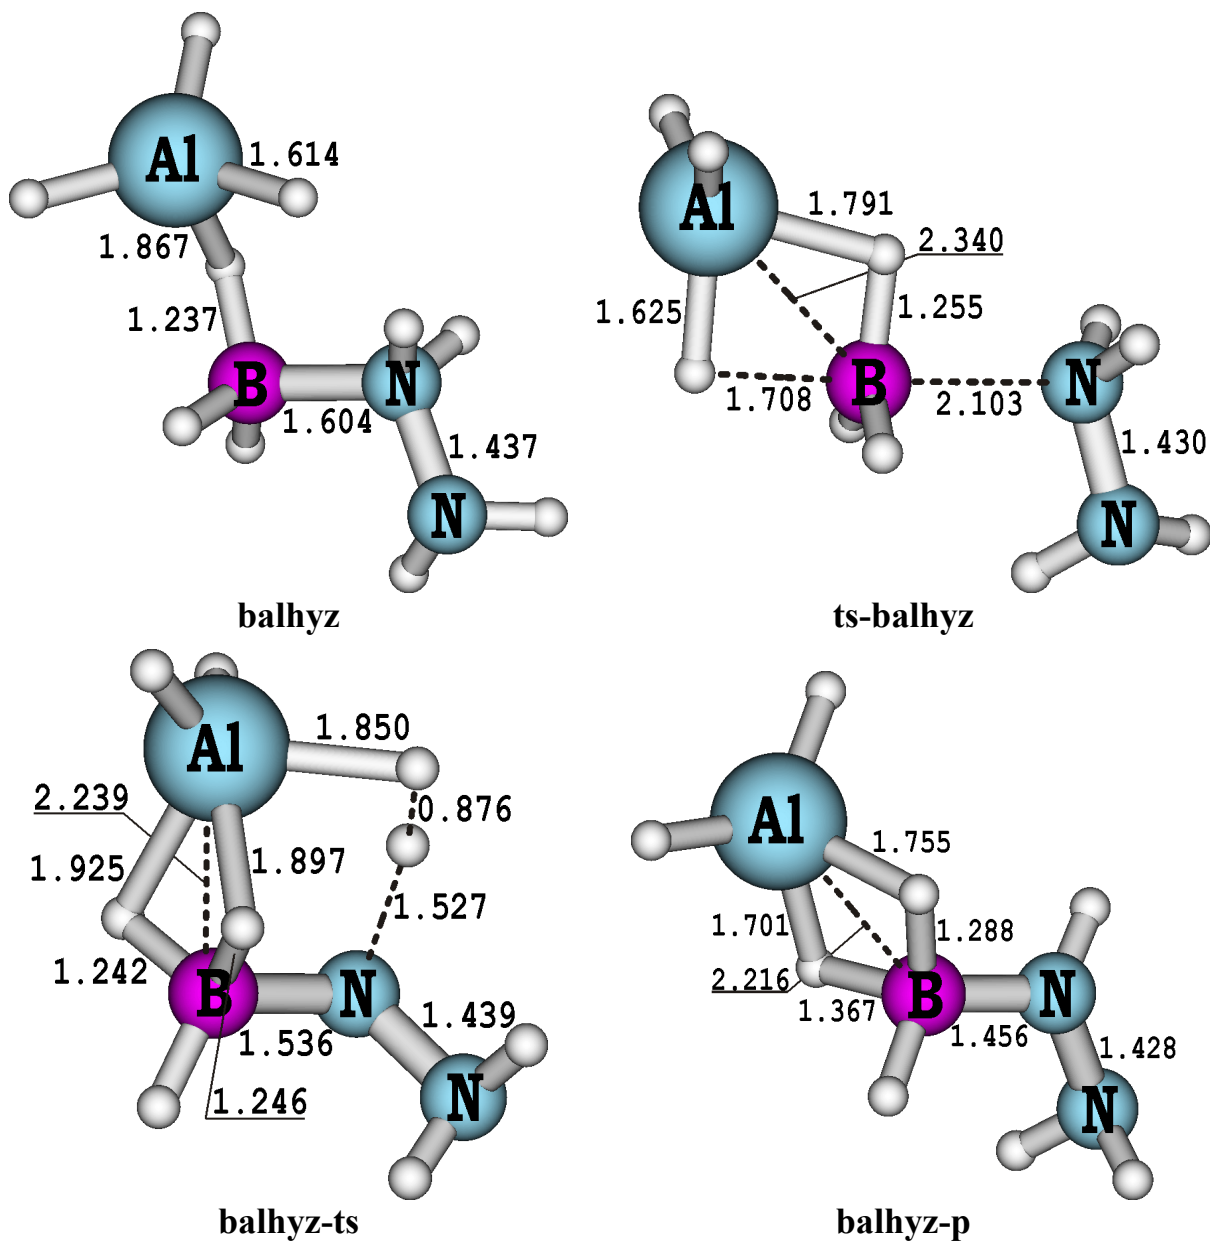

Supplement: b823358f.pdf [file b823358f.pdf]
